# Supplementary material for: Direct Evidence Of Sex In Symbiodiniaceae And A Hypothesis About Meiosis
Source: Research Square preprint supplement (doi:10.21203/rs.3.rs-347043/v1), 2021-04-05
Supplement: Supplementary file 1 [file af4b7329a66dcce2a8f300d8.pdf]

**FIGURE LEGENDS OF SUPPLEMENTARY FIGURES S2-S7 OF “DIRECT EVIDENCE OF SEX IN SYMBIODINIACEAE AND A HYPOTHESIS ABOUT MEIOSIS”, BY R. I. FIGUEROA, L. HOWE-KERR AND A.M.S. CORREA.**

**Figure S2:** 3D videos of cells in figure 4. **S24A:** 3D video of the cell in figure 4A. **S24B:** 3D video of the cell in figure 4B

**Figure S3:** 3D videos of cells in figure 5. **S35A:** 3D video of the cell in figure 5A. **S35B:** 3D video of the cell in figure 5B. **S35C:** video of the cell in figure 5C. **S35D:** video of the cell in figure 5D. **S35E:** video of the cell in figure 5E. **S35F:** video of the cell in figure 5F.

**Figure S4:** 3D videos of cells in figure 6. **S46A:** video of the cell in figure 6A. **S46B:** video of the cell in figure 6B. **S46C:** video of the cell in figure 6C. **S46D:** video of the cell in figure 6D.

**Figure S5:** 3D videos of cells in figure 7. **S57A:** video of the cell in figure 7A. **S57B:** video of the cell in figure 7B. **S57C:** video of the cell in figure 7C. **S57D:** video of the cell in figure 7D. **S57E:** video of the cell in figure 7E. **S57F:** video of the cell in figure 7F.

**Figure S6:** 3D videos of cells in figure 8. **S68A:** video of the cell in figure 8A. **S68B:** video of the cell in figure 8B. **S68C:** video of the cell in figure 8C. **S68D:** video of the cell in figure 8D.

**Figure S7:** 3D videos of cells in figure 9. **S79A:** video of the cell in figure 9A. **S79B:** video of the cell in figure 9B. **S79C:** video of the cell in figure 9C. **S79D:** video of the cell in figure 9D.
